# Supplementary material for: A graphene quantum dot-based FRET system for nuclear-targeted and real-time monitoring of drug delivery
Source: Royal Society of Chemistry journal article supplement (doi:10.1039/c5nr03454j), 2015-01-01
Supplement: c5nr03454j1.pdf [file c5nr03454j1.pdf]

## Graphene Quantum Dot-based FRET System for Nuclear-targeted and Real-time Monitoring of Drug Delivery

Hui Chen, Zhuyuan Wang\*, Shenfei Zong, Peng Chen, Dan Zhu, Lei Wu, Yiping  
Cui\*

*Advanced Photonics Center, Southeast University, 2# Sipailou, Nanjing 210096,  
China.*

[cyp@seu.edu.cn](mailto:cyp@seu.edu.cn), [wangzy@seu.edu.cn](mailto:wangzy@seu.edu.cn)

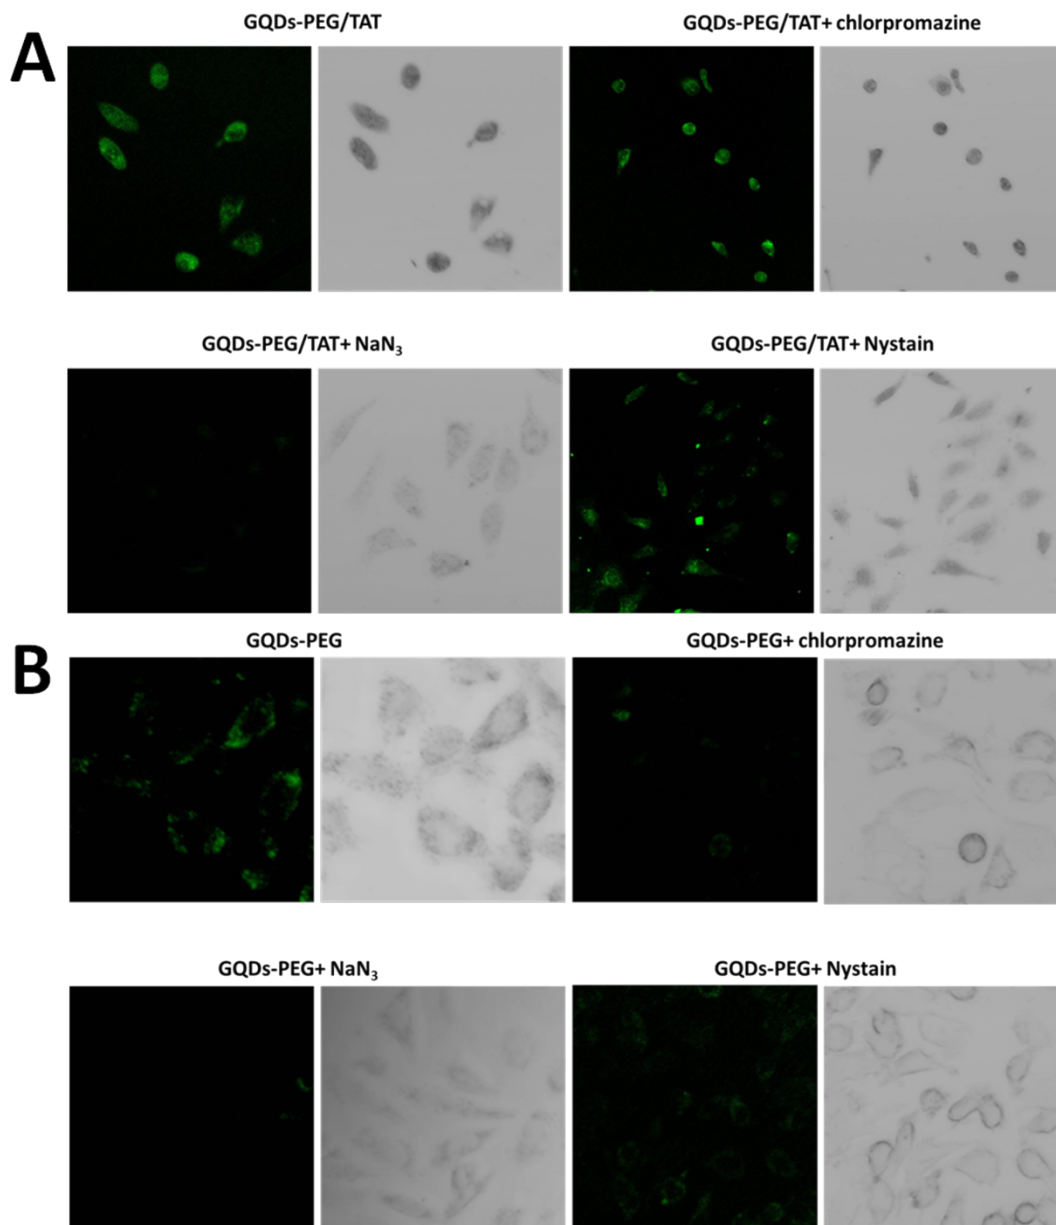

Figure.S1. CLSM images of inhibitor-pretreated HeLa cells incubated with GQDs-PEG/TAT (A) and GQDs-PEG (B) respectively. HeLa cells without pretreatment were examined as controls.

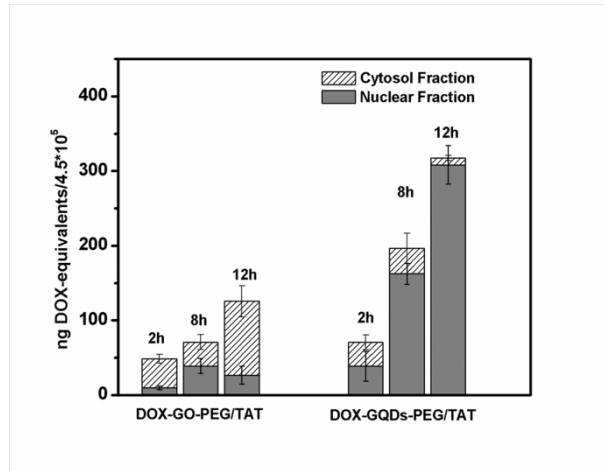

Figure.S2. Quantitative detection of the nuclear and cytosol DOX of HeLa cells after being incubated with DOX-GO-PEG/TAT and DOX-GQDs-PEG/TAT for different time.

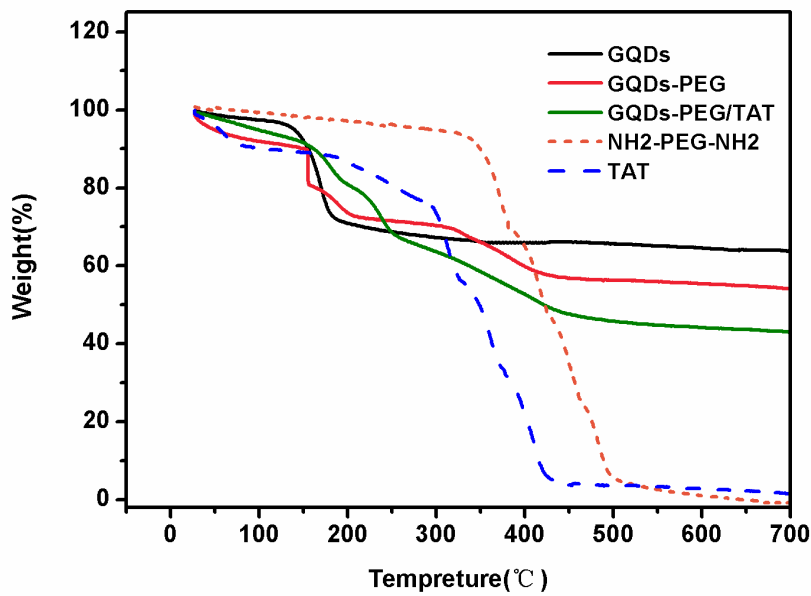

Figure S3. TGA graph for GQDs (control), GQDs-PEG, GQDs-PEG/TAT composites, NH<sub>2</sub>-PEG-NH<sub>2</sub> and TAT.

Table S1. The coupling efficiency of NH<sub>2</sub>-PEG-NH<sub>2</sub> and TAT.

| Composite    | NH <sub>2</sub> -PEG-NH <sub>2</sub> content (w/w)% | TAT content (w/w) % | GQDs content (w/w) % |
|--------------|-----------------------------------------------------|---------------------|----------------------|
| GQDs-PEG/TAT | 13.8                                                | 20                  | 66.2                 |

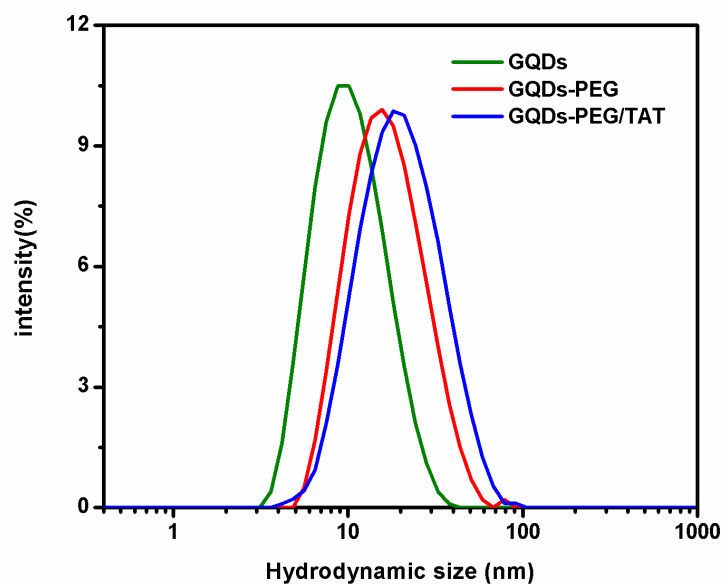

Figure S4. Hydrodynamic size distribution of GQDs, GQDs-PEG and GQDs-PEG/TAT.

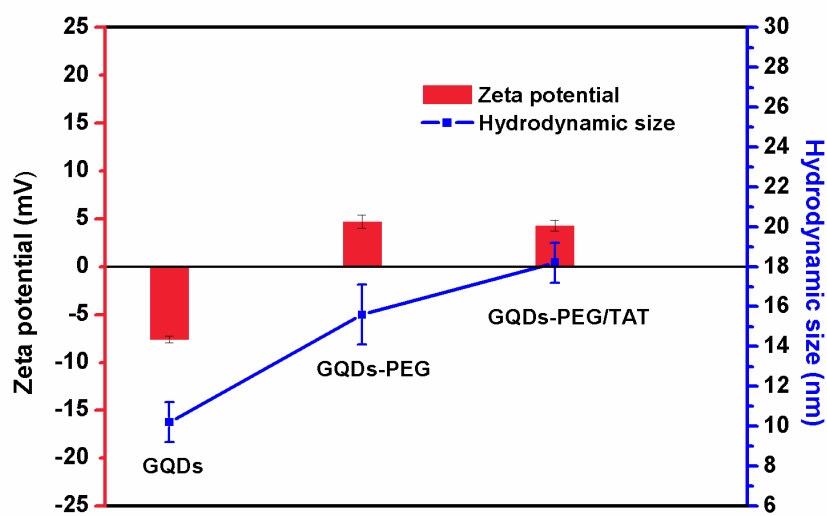

Figure S5. Zeta potential and DLS size measurement of GQDs, GQDs-PEG and GQDs-PEG/TAT.

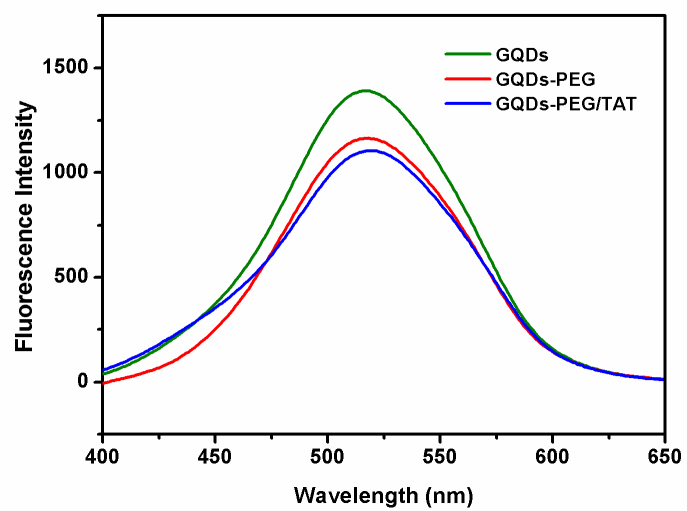

Figure S6. Fluorescence spectra of GQDs, GQDs-PEG and GQDs-PEG/TAT.

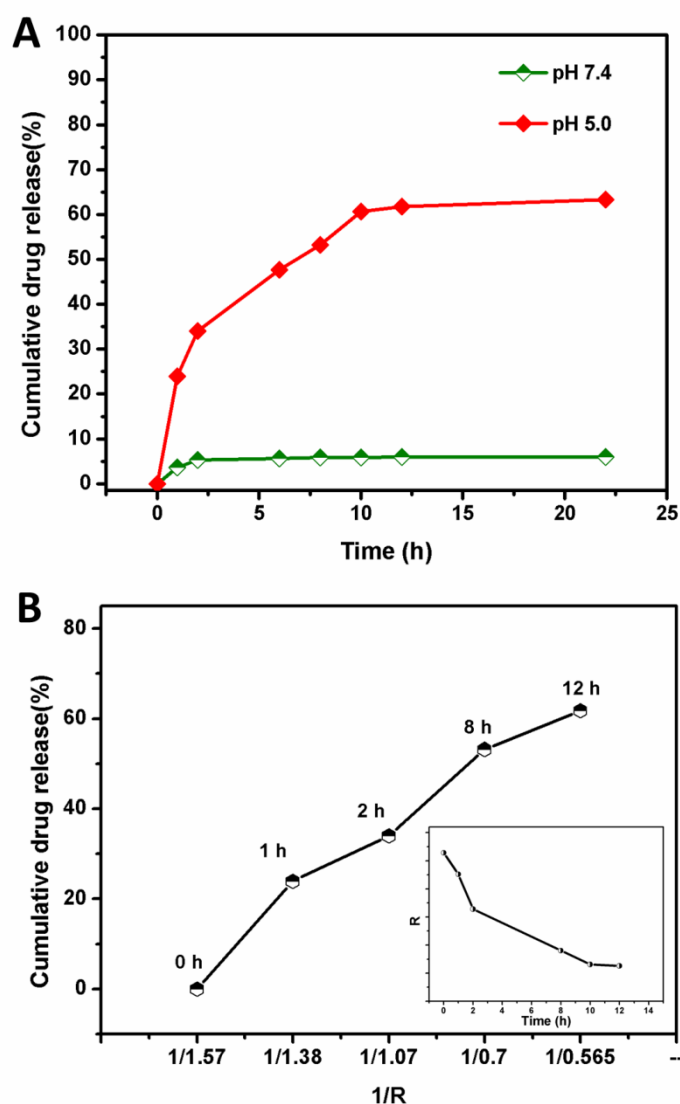

Figure S7. (A) Drug release profile of DOX from GQDs-based FRET carriers. (B) Correlation between the percentage of DOX released DOX percentage and change in the FRET signal (plotted as  $1/R$ ) at varied different time points (Inset: Change in FRET signal  $R$  at different time points).

DOX loading was carried out by mixing 100 $\mu$ l of 10mg/ml DOX (final concentration 0.2mg/ml) with 5 mL 0.1mg/mL GQDs-PEG/TAT for 24 hours at room temperature. Unloaded DOX was removed by dialysis.

The absorbance  $A_1$  at 488nm of the as-synthesized DOX-GQDs-PEG/TAT and absorbance  $A_2$  at 488nm of no DOX loaded GQDs-PEG/TAT were measured, and  $A_1 - A_2$  is corresponding to the absorbance of loaded DOX. Then, the amount of loaded DOX was calculated according to a calibration curve recorded with known

concentrations. The drug loading efficiency was calculated by the equation, % LE of

$$\text{DOX} = \frac{\text{DOX}_l}{\text{DOX}_i} \times 100$$

$\text{DOX}_i$  is the initial amount (mg) of DOX,  $\text{DOX}_l$  is the amount of loaded DOX.

Table S2. Loading efficiency of DOX.

| Loading Condition         | Inatial DOX<br>mg/ml | Loaded DOX<br>mg/ml | %LE of DOX |
|---------------------------|----------------------|---------------------|------------|
| Buffered solution(pH 7.4) | 0.2                  | 0.139               | 69.5       |

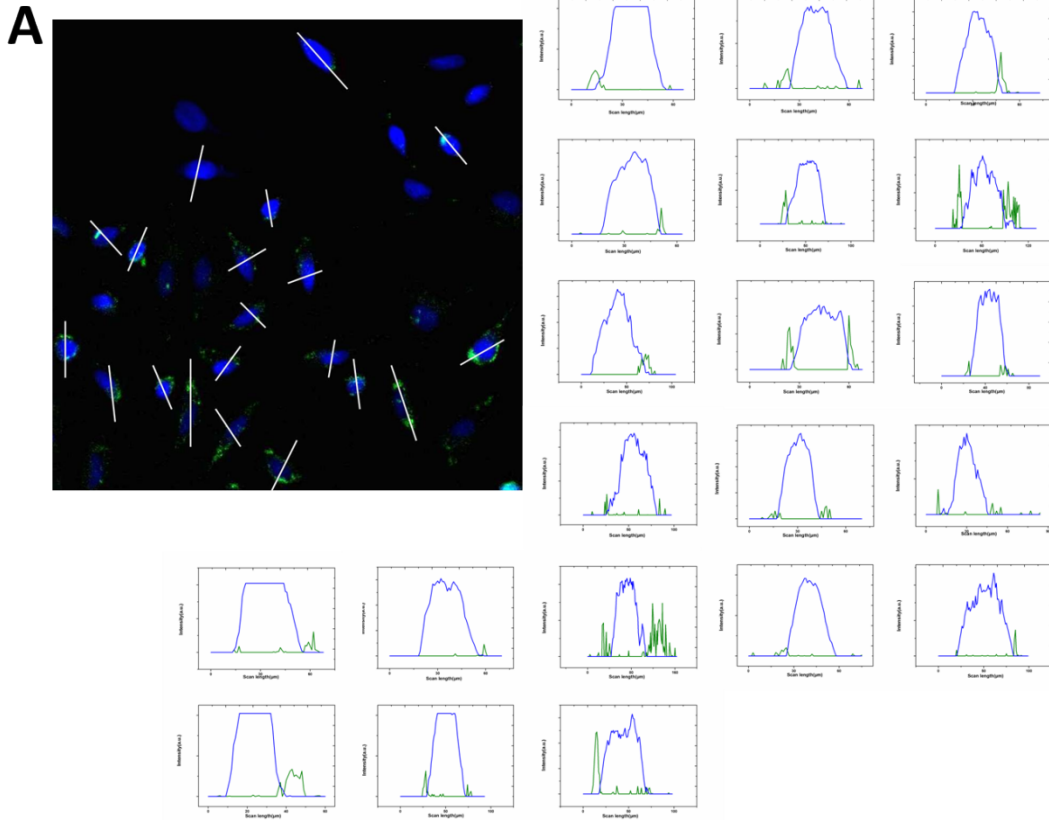

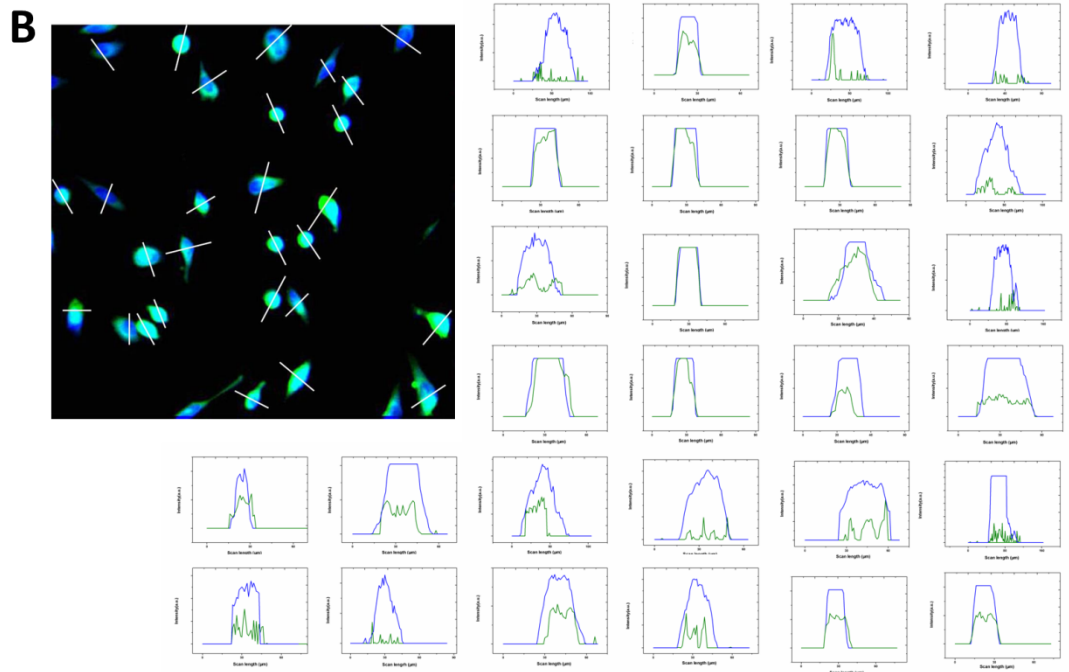

Figure S8. Confocal laser scanning microscopy (CLSM) images and line scanning profiles of fluorescence intensity of HeLa cells incubated with (A) GQDs-PEG and (B) GQDs-PEG/TAT for 4h. The Green fluorescence is from GQDs. The blue fluorescence is from NucRed Live 647 used to stain the nuclei.
